# Supplementary material for: Diacetyl Inhibits the Browning of Fresh-Cut Stem Lettuce by Regulating the Metabolism of Phenylpropane and Antioxidant Ability
Source: MDPI journal article supplement (doi:10.3390/foods12040740), 2023-02-08
Supplement: s1 [file s1]

## Supplementary data:

Table S1 Primer sequence for real time-qPCR

| Gene name     | Forward primer sequences<br>(5'-3') | Reverse primer sequences<br>(5'-3') |
|---------------|-------------------------------------|-------------------------------------|
| <b>Actin</b>  | AGCAACTGGGATGACATGGA                | GGGTTGAGAGGTGCCTCAGT                |
| <b>LsPAL1</b> | GGAAAACCGCAGAAGCAGTC                | TTCTCGCAGAATCTCGACGG                |
| <b>LsPAL2</b> | CGATAAGGTGTTCACTGCTTTG              | TACACATTTGGCATGAGAGTTG              |
| <b>LsPAL3</b> | GCTCGGAAGTGGGTTCTTAACA              | CACACTCCAACAAGGGATCAAT              |
| <b>LsPAL4</b> | AACAATGGCGAGAAGGAGAAA               | TCGATCCTGTTAGGGATTGCTAA             |
| <b>LsC4H</b>  | CTTGAAGCACTCTACTGTCG                | TCAAAATCTCCACATCACAC                |
| <b>Ls4CL</b>  | GTTTCTACACAAGTTGCTCC                | TACAGTTTGGAGGTTGCAAG                |

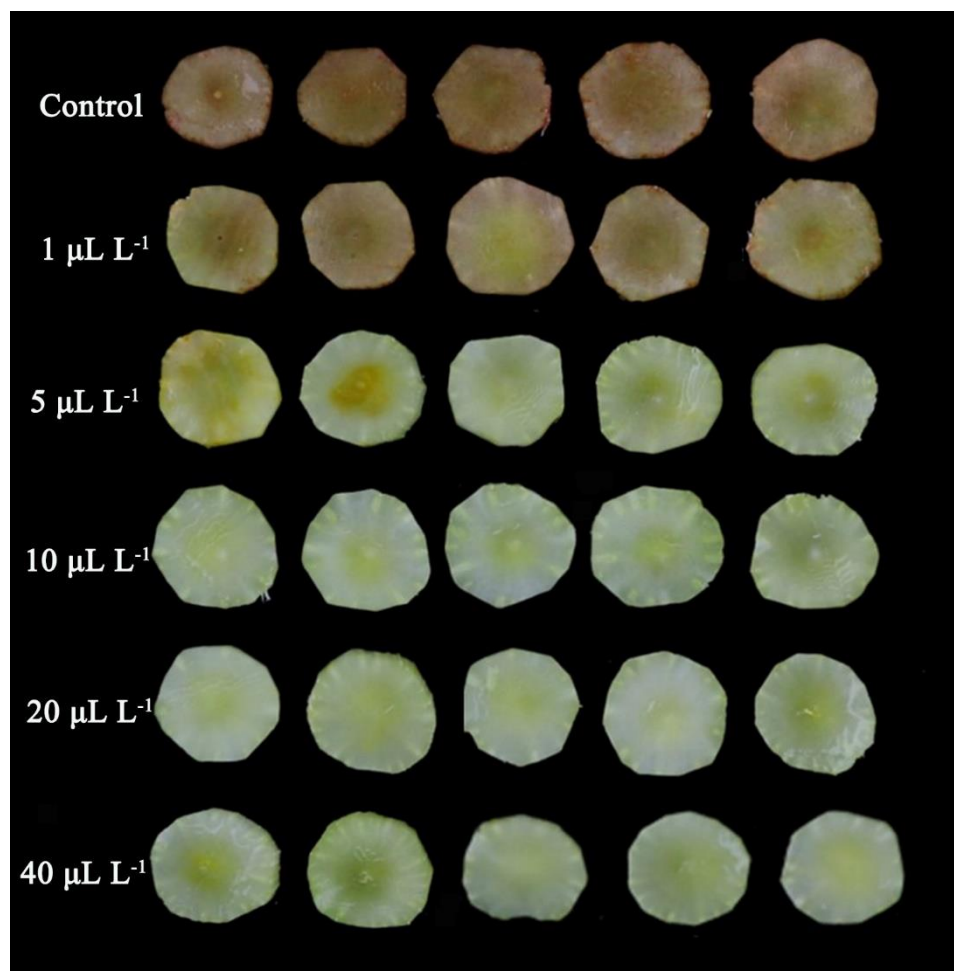

Figure S1. Appearance of fresh-cut stem lettuce treated with different concentrations of

diacetyl for 12 d at 4°C.

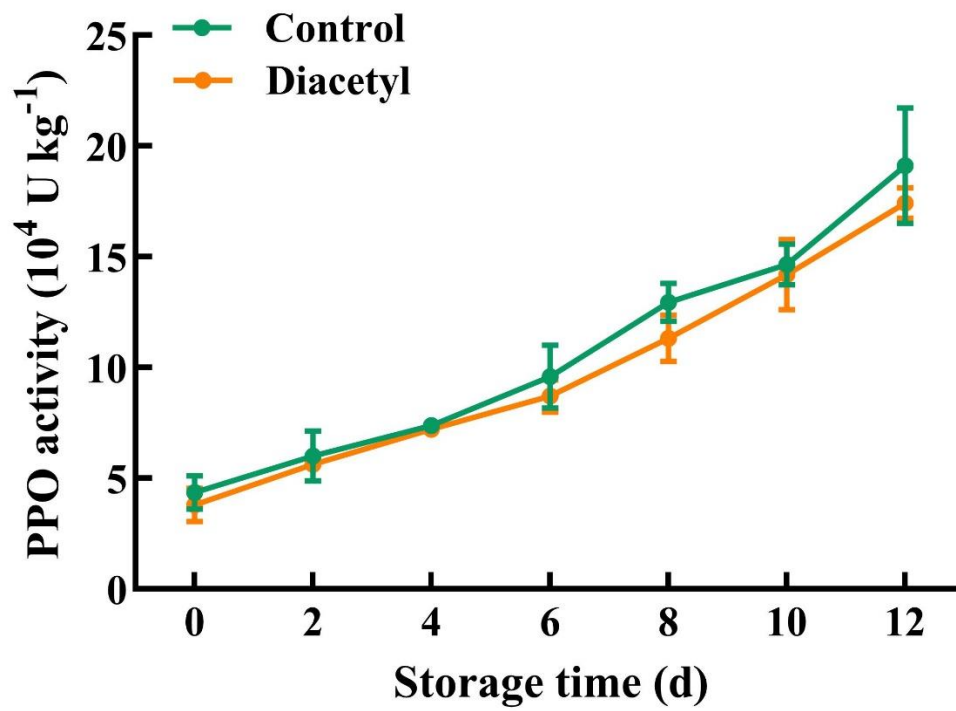

Figure S2. Effects of diacetyl treatment on PPO activity during storage time at 4 °C.

Vertical bars represent standard deviations.
